# Supplementary material for: Conformational changes of β-carotene and zeaxanthin immersed in a model membrane through atomistic molecular dynamics simulations
Source: Royal Society of Chemistry journal article supplement (doi:10.1039/c3cp43947j), 2013-01-01
Supplement: c3cp43947j_2.pdf [file c3cp43947j_2.pdf]

# SUPPORTING INFORMATION: Conformational changes of $\beta$ -carotene and zeaxanthin immersed in a model membrane through atomistic molecular dynamics simulations

Javier Cerezo\*, José Zúñiga<sup>†</sup>, Adolfo Bastida, Alberto Requena<sup>‡</sup>  
Departamento de Química Física  
Universidad de Murcia.  
30100 Murcia. Spain

José Pedro Cerón-Carrasco  
CEISAM, UMR CNRS 6230, BP 92208, Université de Nantes,  
2, rue de la Houssinière, 44322 Nantes Cedex 3. France

March 6, 2013

---

\*E-mail: jcb1@um.es

<sup>†</sup>E-mail: zuniga@um.es

<sup>‡</sup>E-mail: rqna@um.es

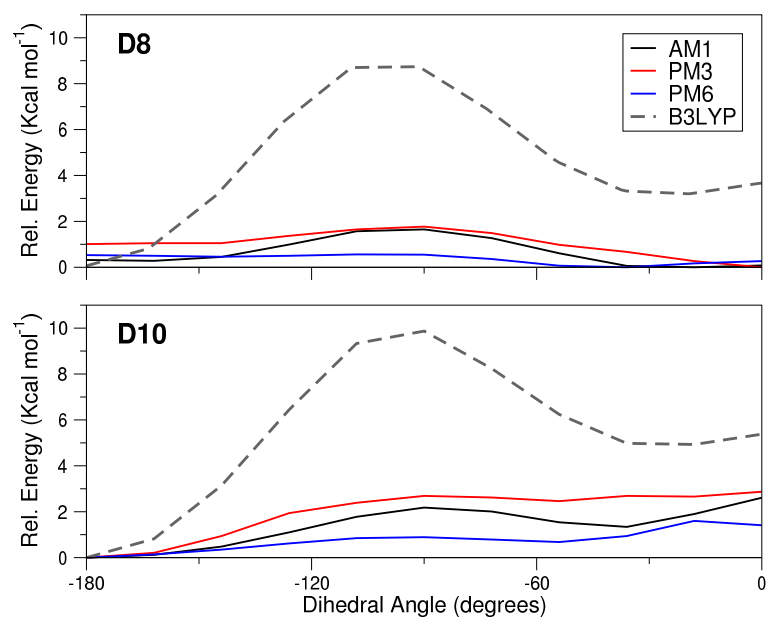

Figure S.1: Potential energy plots generated by the scan around the dihedral defined by atoms C7C8C9C10 (D8) and C9C10C11C12 (D10) of  $\beta$ -carotene using different semiempirical methods (AM1, PM3 and PM6) and a DFT calculation (B3LYP/6-31G(d)). Atom labeling correspond to that in Figure 1 in the paper. Note the significant differences in the energy barriers and location of minima obtained from semiempirical methods as compare with the DFT calculation.

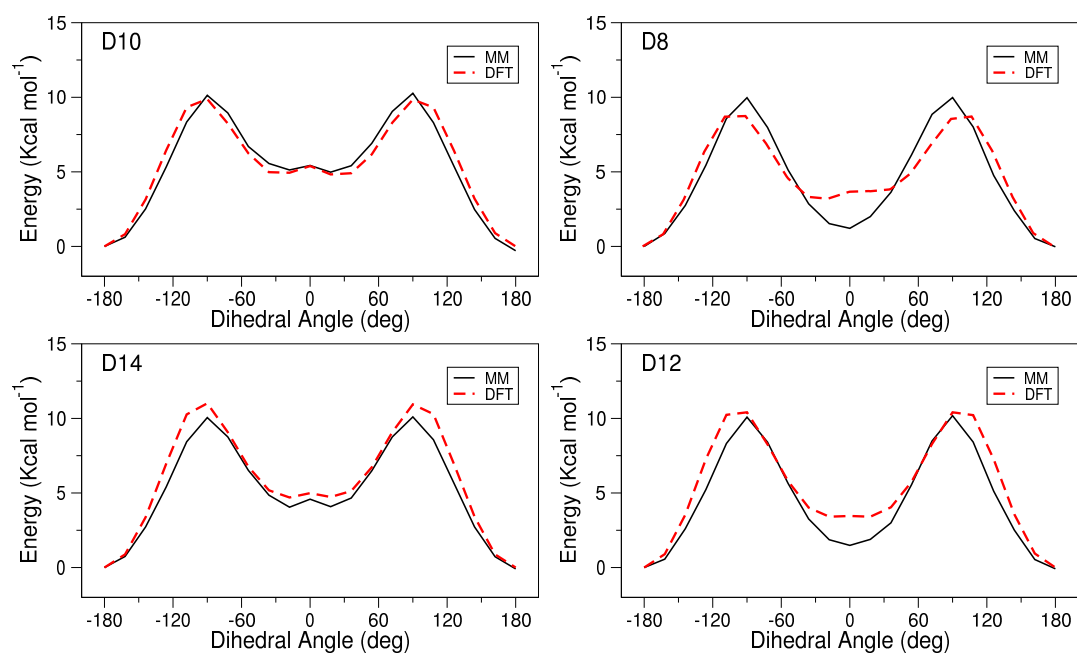

Figure S.2: Potential energy plots for dihedrals associated to single bonds calculated using the parameters for  $\beta$ -carotene derived in this work.

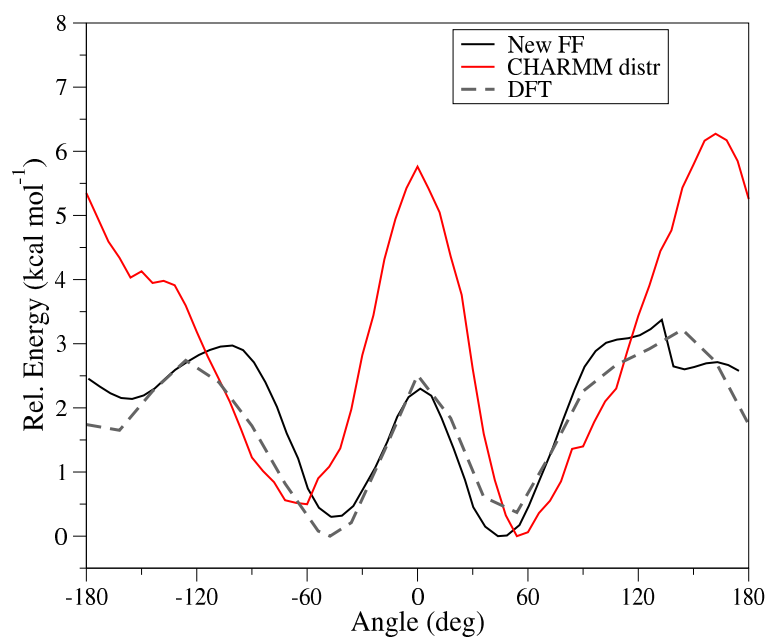

Figure S.3: Potential energy plots for the dihedrals D6 of  $\beta$ -carotene using the force fields parameters derived in this work (NewnFF) and with those from the original CHARMM27 FF distribution (CHARMM distr). The energy plot computed at B3LYP/6-31G(d) is included for comparison.

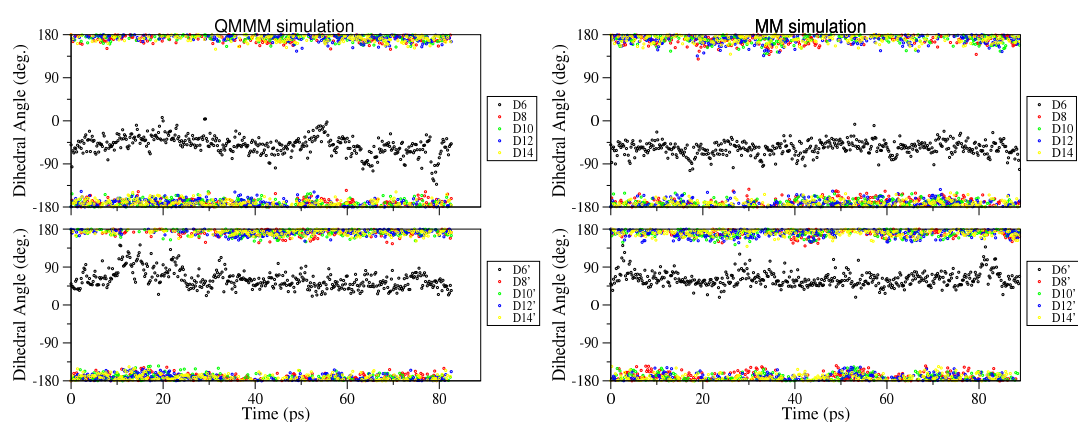

Figure S.4: Evolution of the dihedral angles of  $\beta$ -carotene along an *NVE* simulation of this molecule in water using a QMMM (left) and a MM (right) level to compute the potential. The QMMM approach consisted in B3LYP/3-21G for  $\beta$ -carotene (QM part) and CHARMM27+TIP3P for water and water-carotene interactions within an ONIOM scheme. The MM calculation used the parameters derived in this paper for  $\beta$ -carotene and TIP3P for water.

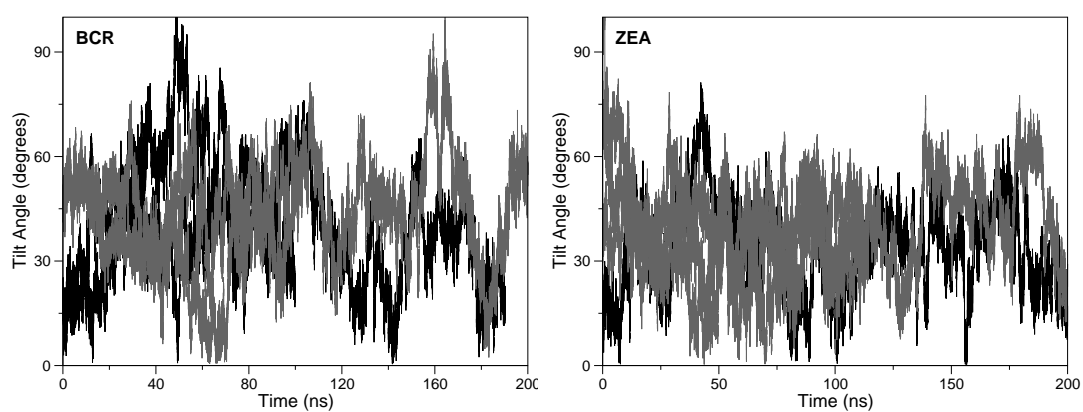

Figure S.5: Variation of the tilt angle for the carotenoid chain along the after-equilibration simulations of  $\beta$ -carotene (**BCR**) and zeaxanthin (**ZEA**) embedded in the DMPC bilayer, started originally from both parallel (black) and perpendicular (gray) orientations of the carotenoids with respect to the membrane normal axis.

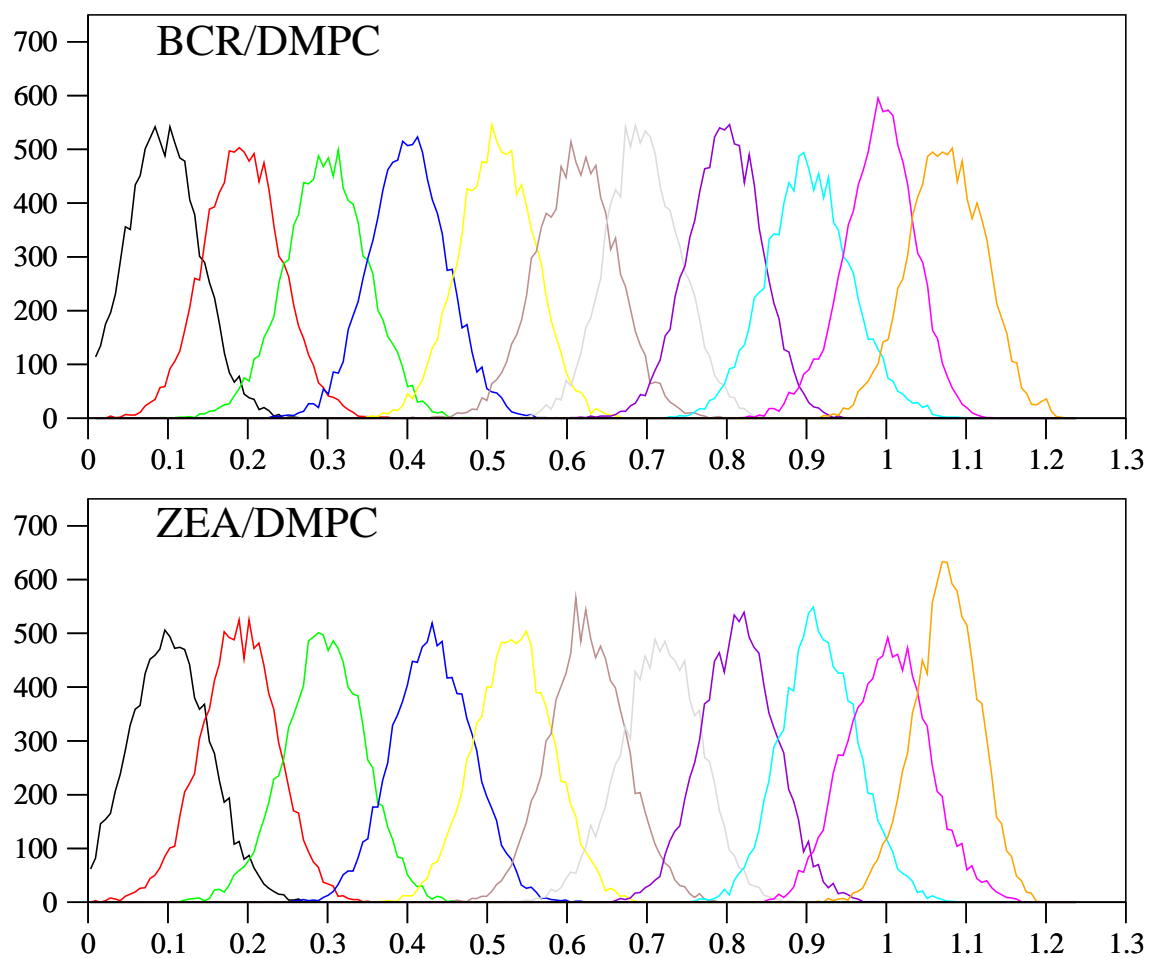

Figure S.6: Histograms corresponding to all windows sampled for the computation of the potential of mean force through the umbrella sampling technique.

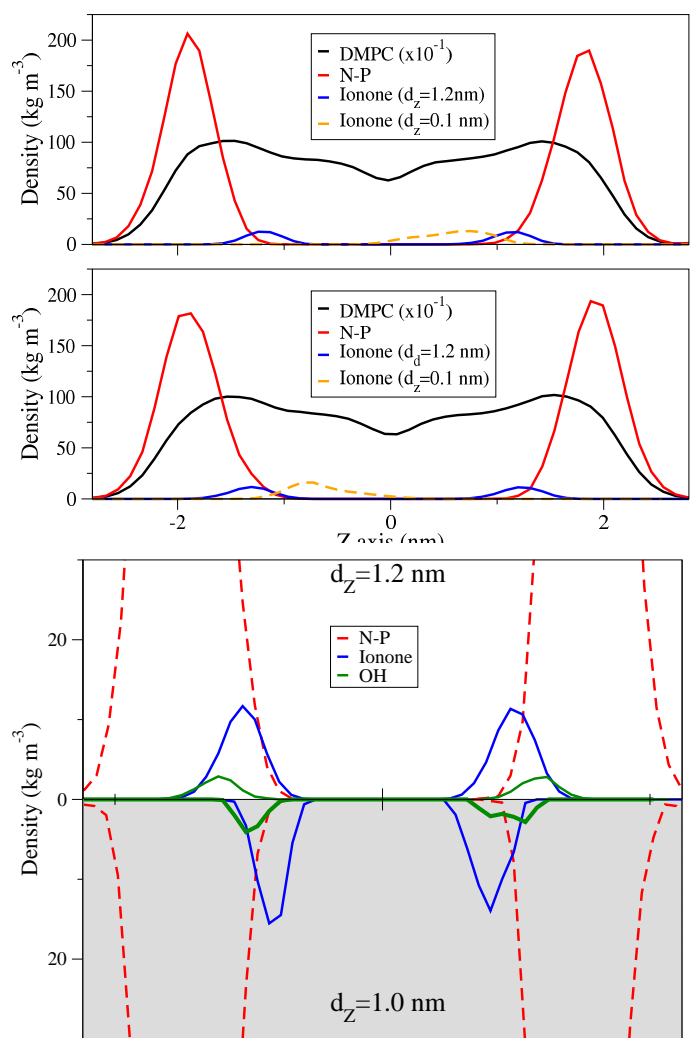

Figure S.7: Density profiles showing: (top) the location of the membrane (DMPC), the polar heads (P-N) and the  $\beta$ -ionone rings in the first and last sampling windows in umbrella sampling; and (down) a focuss on the last ( $d_z = 1.2$  nm) and 10th windows ( $d_z = 1.0$  nm) for zeaxanthin also showing the location of the hidroxy groups; the nature of the overlapping distributions on each case is responsible for the relative stability of each one (see PMF in the text).



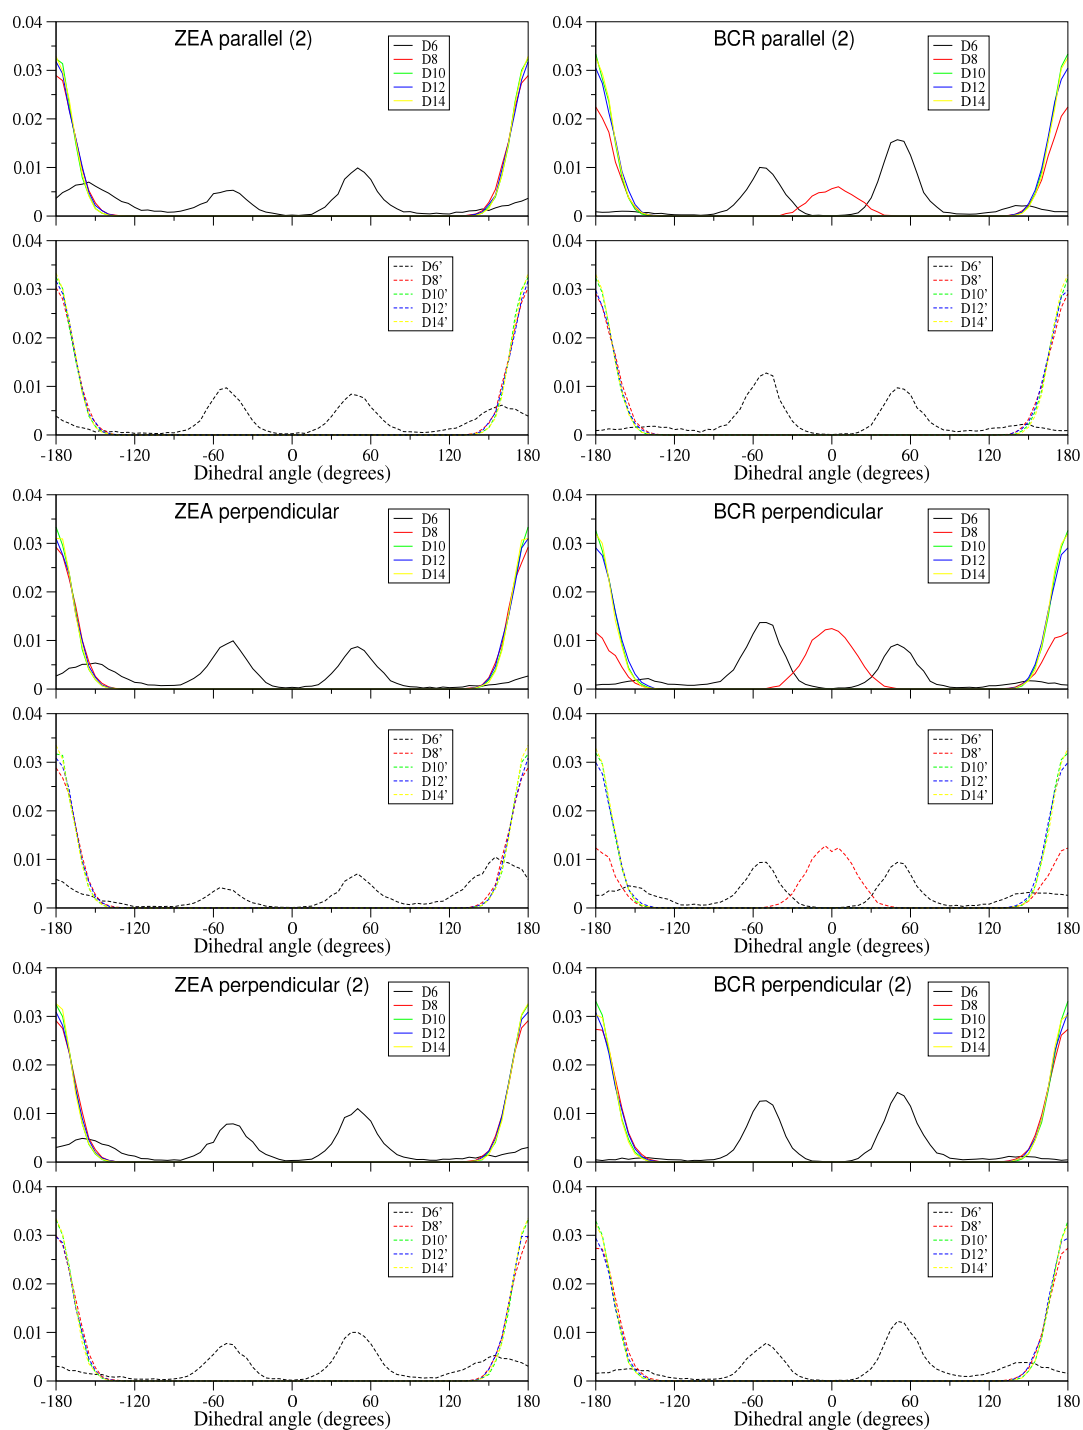

Figure S.8a: Dihedral distribution associated to single bonds along the conjugated chain: D6, D8, D10, D12 and D14, and the symmetric D6', D8', D10', D12' and D14', obtained with a 100 ns simulation of  $\beta$ -carotene (BCR) and zeaxanthin (ZEA) embedded in a DMPC bilayer, initially placed with either a parallel or a perpendicular arrangement with respect to the axis normal to the DMPC membrane as indicated on the plots.

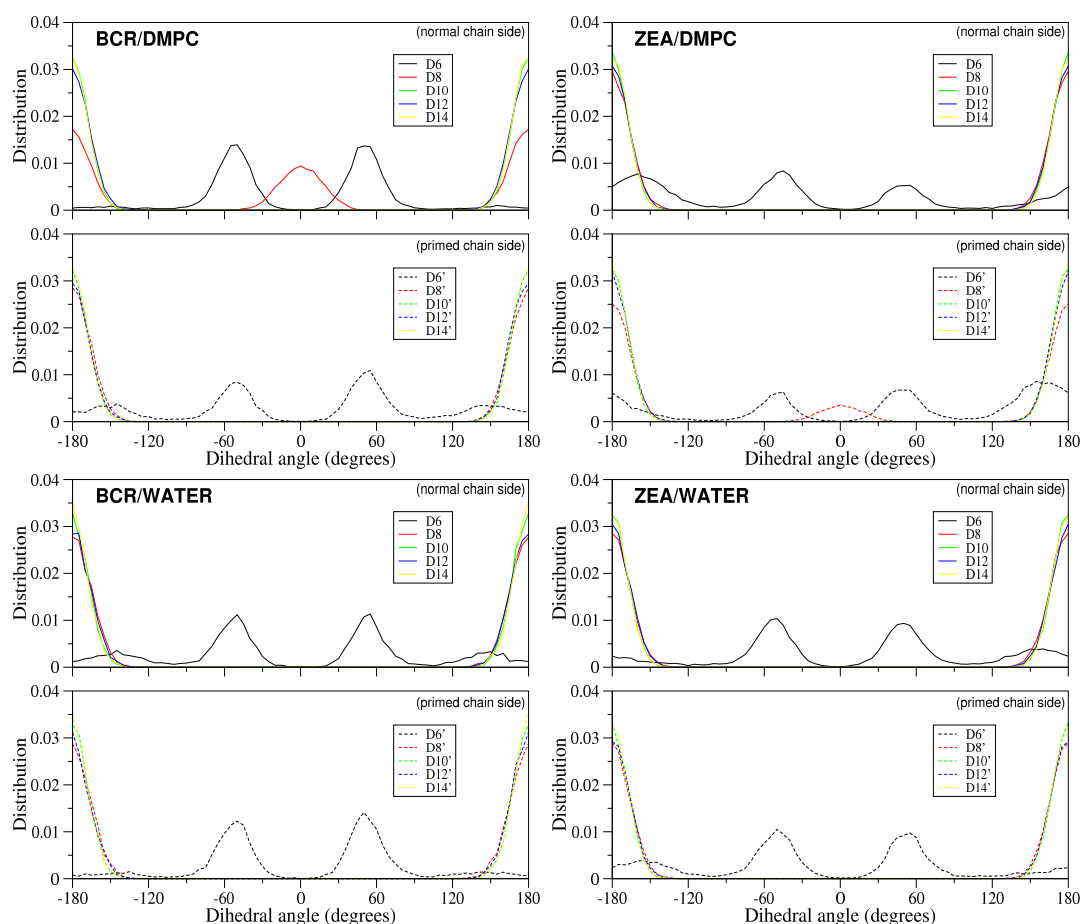

Figure S.8b: Dihedral distribution associated to single bonds along the conjugated chain: D6, D8, D10, D12 and D14, and the symmetric D6', D8', D10', D12' and D14', obtained with a 100 ns simulation of  $\beta$ -carotene (BCR) and zeaxanthin (ZEA) embedded in a DMPC bilayer, initially placed with either a parallel or a perpendicular arrangement with respect to the axis normal to the DMPC membrane as indicated on the plots (duplicated simulations with respect to Figure S.8a).

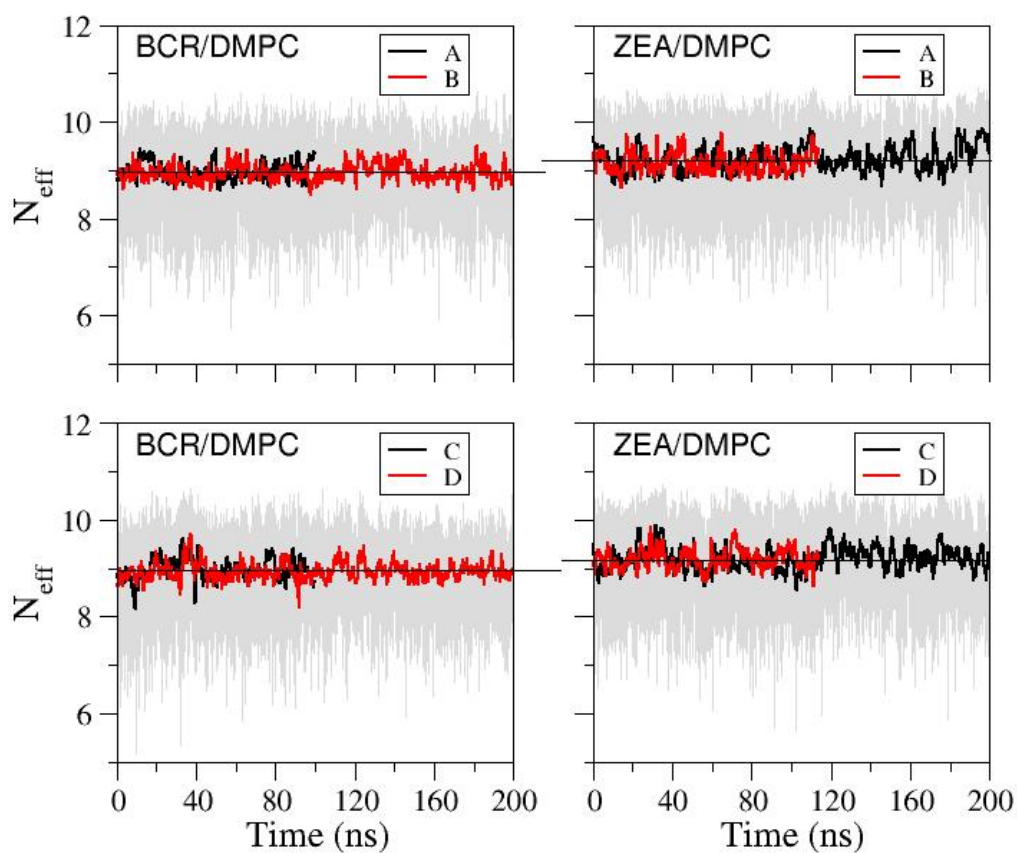

Figure S.9: Evolution of the effective conjugated chain length (computed with protocol described in Section III of the paper) during the simulation time for all the systems presented in the text. All actual values display a large dispersion (light grey) and for clarity, partial averages taken every 100 points are also included, together with the mean value (orange for DMPC/BCR systems and blue for DMPC/ZAE systems).

Table S.1: Bonded parameters (bonds) employed in this work to describe the interactions of  $\beta$ -carotene and zeaxanthin. In the definition, the atom types that form the bond ( $i - j$ ) are specified as well as the bond type using the notation: - (single bond) and = (double bond).

| Bonds: $V_{ij}^{bond} = k_b(r_{ij} - b_0)^2$ |            |                                                |
|----------------------------------------------|------------|------------------------------------------------|
| Definition                                   | $b_0$ (nm) | $k_b$ (KJ mol <sup>-1</sup> nm <sup>-1</sup> ) |
| CA=CA*                                       | 0.135      | 255224.0                                       |
| CA-CA*                                       | 0.143      | 220000.0                                       |
| CT1-CA#                                      | 0.149      | 192464.0                                       |
| CT2-CA                                       | 0.149      | 192464.0                                       |
| CT3-CA                                       | 0.149      | 192464.0                                       |
| CT2-CT1                                      | 0.1538     | 186188.0                                       |
| CT2-CT2                                      | 0.153      | 186188.0                                       |
| CT3-CT1                                      | 0.1538     | 186188.0                                       |
| CT3-CT2                                      | 0.1528     | 186188.0                                       |
| HA-CT1                                       | 0.1111     | 258571.2                                       |
| HA-CT2*                                      | 0.110      | 258571.2                                       |
| HA-CT3*                                      | 0.110      | 269449.6                                       |
| HP-CA*                                       | 0.109      | 284512.0                                       |
| OH1-CT1                                      | 0.142      | 358150.4                                       |
| OH1-H                                        | 0.096      | 456056.0                                       |

\*Modified with respect to CHARMM27.

#Add with respect to CHARMM27.

Table S.2: Bonded parameters (angles) employed in this work to describe the interactions of  $\beta$ -carotene and zeaxanthin. In the definition, the atom types that form the angle ( $i-j-k$ ) are specified as well as the bond type using the notation: - (single bond), = (double bond) and  $\simeq$  (parameter used for both single and double bonds).

| Angles + UB: $V_{ijk}^{angle} = k_{\alpha}(\alpha_{ijk} - \alpha_{ijk}^0)^2 + k_{UB}(r_{ik} - r_{ik}^0)^2$ |                  |                                                        |                  |           |
|------------------------------------------------------------------------------------------------------------|------------------|--------------------------------------------------------|------------------|-----------|
| Definition                                                                                                 | $\alpha^0$ (deg) | $k_{\alpha}$ (KJ mol <sup>-1</sup> deg <sup>-1</sup> ) | $r_{1,3}^0$ (nm) | $k_{UB}$  |
| CA=CA-CA*                                                                                                  | 123.00           | 334.7200                                               | 0.246            | 29288.0   |
| CT3-CA $\simeq$ CA*                                                                                        | 124.00           | 383.2544                                               | 0.254            | 29288.0   |
| HP-CA $\simeq$ CA*                                                                                         | 120.00           | 251.04                                                 | 0.210            | 18409.6   |
| HP-CA-CT3#                                                                                                 | 118.00           | 251.04                                                 | 0.210            | 18409.6   |
| HA-CT3-CA                                                                                                  | 107.50           | 412.5424                                               | 0.0              | 0.0       |
| CT2-CA $\simeq$ CA                                                                                         | 122.30           | 383.2544                                               | 0.0              | 0.0       |
| CT1-CA $\simeq$ CA#                                                                                        | 122.30           | 383.2544                                               | 0.0              | 0.0       |
| CT2-CA-CT3#                                                                                                | 122.30           | 383.2544                                               | 0.0              | 0.0       |
| CT2-CT1-CA#                                                                                                | 107.50           | 433.4624                                               | 0.0              | 0.0       |
| CT3-CT1-CA#                                                                                                | 107.50           | 433.4624                                               | 0.0              | 0.0       |
| CT2-CT2-CA#                                                                                                | 107.50           | 433.4624                                               | 0.0              | 0.0       |
| HA-CT2-CA                                                                                                  | 107.50           | 412.5424                                               | 0.0              | 0.0       |
| CT2-CT2-CT1                                                                                                | 113.50           | 488.2728                                               | 0.2561           | 9338.688  |
| CT2-CT2-CT2                                                                                                | 113.60           | 488.2728                                               | 0.2561           | 9338.688  |
| CT3-CT1-CT2                                                                                                | 114.00           | 446.4328                                               | 0.2561           | 6694.4    |
| CT3-CT1-CT3                                                                                                | 114.00           | 446.4328                                               | 0.2561           | 6694.4    |
| HA-CT2-CT1                                                                                                 | 110.10           | 279.74224                                              | 0.2179           | 18853.104 |
| HA-CT2-CT2                                                                                                 | 110.10           | 221.752                                                | 0.2179           | 18853.104 |
| HA-CT2-HA                                                                                                  | 109.00           | 297.064                                                | 0.1802           | 4518.72   |
| HA-CT3-CT                                                                                                  | 110.10           | 279.74224                                              | 0.2179           | 18853.104 |
| HA-CT3-HA                                                                                                  | 108.40           | 297.064                                                | 0.1802           | 4518.72   |
| H-OH1-CT1                                                                                                  | 106.00           | 481.16                                                 | 0.0              | 0.0       |
| HA-CT1-CT2                                                                                                 | 110.10           | 288.696                                                | 0.2179           | 18853.104 |
| HA-CT2-CT1                                                                                                 | 110.10           | 279.74224                                              | 0.2179           | 18853.104 |
| OH1-CT1-CT2#                                                                                               | 110.10           | 633.4576                                               | 0.0              | 0.0       |
| OH1-CT1-HA                                                                                                 | 108.89           | 384.0912                                               | 0.0              | 0.0       |
| CT2-CT1-CT2#                                                                                               | 111.00           | 446.4328                                               | 0.2561           | 6694.4    |
| CT1-CT2-CA#                                                                                                | 107.50           | 433.4624                                               | 0.0              | 0.0       |
| CT1-CT2-CT#                                                                                                | 107.50           | 433.4624                                               | 0.0              | 0.0       |

\*Modified with respect to CHARMM27.

#Add with respect to CHARMM27.

Table S.3: Bonded parameters (dihedrals) employed in this work to describe the interactions of  $\beta$ -carotene and zeaxanthin. In the definition, the atom types that form the dihedral ( $i - j - k - l$ ) are specified as well as the bond type using the notation: - (single bond) and = (double bond).

| Dihedrals: $Vdihed_{ijkl} = k_{\theta}(1 + \cos(n\theta_{ijkl} - \theta_{ijkl}^0))$ |                  |                                                        |              |
|-------------------------------------------------------------------------------------|------------------|--------------------------------------------------------|--------------|
| Definition                                                                          | $\theta^0$ (deg) | $k_{\theta}$ (KJ mol <sup>-1</sup> deg <sup>-1</sup> ) | Mult.( $n$ ) |
| CA=CA-CA=CA*                                                                        | 180.0            | 5.639                                                  | 2            |
| HP-CA-CA-HP*                                                                        | 180.0            | 5.373                                                  | 2            |
| CA=CA-CA-HP*                                                                        | 180.0            | 7.409                                                  | 2            |
| CA=CA-CA-CT3*                                                                       | 180.0            | 5.665                                                  | 2            |
| HP-CA-CA-CT3*                                                                       | 180.0            | 7.067                                                  | 2            |
| CA-CA=CA-CA*                                                                        | 180.0            | 23.3467                                                | 2            |
| CT2-CA=CA-CT1#                                                                      | 180.0            | 23.3467                                                | 2            |
| CT3-CA=CA-CT1#                                                                      | 180.0            | 23.3467                                                | 2            |
| CT2-CA=CA-CA*                                                                       | 180.0            | 23.3467                                                | 2            |
| CT-CA=CA-CA1#                                                                       | 180.0            | 23.3467                                                | 2            |
| CT3-CA=CA-CA*                                                                       | 180.0            | 23.3467                                                | 2            |
| HP-CA=CA-CA*                                                                        | 180.0            | 31.6310                                                | 2            |
| HP-CA=CA-CT#                                                                        | 180.0            | 31.6310                                                | 2            |
| HP-CA=CA-CT2*                                                                       | 180.0            | 31.6310                                                | 2            |
| HP-CA=CA-CT3*                                                                       | 180.0            | 31.6310                                                | 2            |
| HP-CA=CA-HP*                                                                        | 180.0            | 18.0749                                                | 2            |
| HA-CT3-CA=CA*                                                                       | 180.0            | 0.494                                                  | 3            |
| HA-CT3-CA-CA*                                                                       | 0.0              | 0.494                                                  | 3            |
| CT2-CT1-CA-CA#                                                                      | 0.0              | 0.8368                                                 | 3            |
| CT3-CT1-CA-CA#                                                                      | 0.0              | 0.8368                                                 | 3            |
| X-CT1-CT2-CT2*                                                                      | 0.0              | 0.60                                                   | 3            |
| X-CT1-CT2-HA*                                                                       | 0.0              | 0.00                                                   | 3            |
| X-CT1-CT3-HA*                                                                       | 0.0              | 0.60                                                   | 3            |
| X-CT2-CT2-X                                                                         | 0.00             | 0.81588                                                | 3            |
| X-CT2-CA-X                                                                          | 0.00             | 0.0                                                    | 6            |
| X-CT3-CA-X                                                                          | 0.00             | 0.0                                                    | 6            |
| H-OH1-CT1-CT2#                                                                      | 0.00             | 5.56472                                                | 1            |
| H-OH1-CT1-CT2#                                                                      | 0.00             | 0.75312                                                | 2            |
| H-OH1-CT1-CT2#                                                                      | 0.00             | 1.33888                                                | 3            |
| HA-CT1-CT2-CA                                                                       | 0.00             | 0.16736                                                | 3            |
| X-CT1-OH1-X                                                                         | 0.00             | 0.58576                                                | 3            |
| X-CT1-CT2-CT1#                                                                      | 0.00             | 0.60                                                   | 3            |
| X-CT1-CT2-X                                                                         | 0.00             | 0.8368                                                 | 3            |

\*Modified with respect to CHARMM27.

#Add with respect to CHARMM27.

Table S.4: Partial charges employed to describe the electrostatic interactions for  $\beta$ -carotene and zeaxanthin obtained as described in this work (see text).

| Atom | Partial Charge (a.u.) |            |
|------|-----------------------|------------|
|      | $\beta$ -Carotene     | Zeaxanthin |
| C1   | 0.500                 | 0.737      |
| C2   | -0.230                | -0.473     |
| HR21 | 0.090                 | 0.100      |
| HR22 | 0.090                 | 0.100      |
| C3   | -0.010                | 0.411      |
| H31  | 0.090                 | -0.013     |
| H32  | 0.090                 | –          |
| C4   | -0.230                | -0.348     |
| H41  | 0.090                 | 0.114      |
| H42  | 0.090                 | 0.114      |
| C5   | 0.240                 | 0.392      |
| C6   | -0.460                | -0.542     |
| C7   | 0.100                 | 0.123      |
| H7   | 0.140                 | 0.075      |
| C8   | -0.320                | -0.356     |
| H8   | 0.140                 | 0.162      |
| C9   | 0.240                 | 0.254      |
| C10  | -0.320                | -0.305     |
| H10  | 0.140                 | 0.146      |
| C11  | 0.000                 | 0.003      |
| H11  | 0.140                 | 0.125      |
| C12  | -0.320                | -0.348     |
| H12  | 0.140                 | 0.165      |
| C13  | 0.240                 | 0.276      |
| C14  | -0.320                | -0.293     |
| H14  | 0.140                 | 0.128      |
| C15  | -0.100                | -0.094     |
| H15  | 0.140                 | 0.148      |
| C31  | -0.460                | -0.492     |
| H311 | 0.090                 | 0.108      |
| H312 | 0.090                 | 0.108      |
| H313 | 0.090                 | 0.108      |
| C32  | -0.460                | -0.492     |
| H321 | 0.090                 | 0.108      |
| H322 | 0.090                 | 0.108      |
| H323 | 0.090                 | 0.108      |
| C33  | -0.400                | -0.466     |
| H331 | 0.090                 | 0.119      |
| H332 | 0.090                 | 0.119      |
| H333 | 0.090                 | 0.119      |
| C34  | -0.280                | -0.351     |
| H341 | 0.090                 | 0.100      |
| H342 | 0.090                 | 0.100      |
| H343 | 0.090                 | 0.100      |
| C35  | -0.280                | -0.321     |
| H351 | 0.090                 | 0.092      |
| H352 | 0.090                 | 0.092      |
| H353 | 0.090                 | 0.092      |
| O1   | –                     | -0.669     |
| HO1  | –                     | 0.409      |
